# Supplementary material for: Society for Endocrinology guidelines for the diagnosis and management of post-bariatric hypoglycaemia
Source: PubMed Central journal article supplement (PMC11046333; doi:10.1530/ec-23-0285), 2024-04-01
Supplement: supplementary_table_1.pdf [file supplementary_table_1.pdf]

# Appendix 1

Below is the search strategy for Medline conducted through the Ovid platform.

| # | Searches                                                                                                                                                                          |
|---|-----------------------------------------------------------------------------------------------------------------------------------------------------------------------------------|
| 1 | (bariatric surg\$ or bariatric operation\$ or bariatric procedure\$ or obesity surg\$).mp.                                                                                        |
| 2 | exp Bariatric Surgery/                                                                                                                                                            |
| 3 | (sleeve gastrectom\$ or gastric sleeve\$ or laparoscopic sleeve gastrectom\$ or lap sleeve\$ or vertical sleeve gastrectom\$ or VSG).mp.                                          |
| 4 | (Gastroplast\$ or endoscopic gastroplast\$ or endoscopic sleeve gastroplast\$ or vertical banded gastroplast\$ or vbg or banded gastroplast\$).mp.                                |
| 5 | (LAGB or laparoscopic adjust\$ gastric band\$ or lap band\$).mp.                                                                                                                  |
| 6 | (RYGB or Roux en Y or Roux en Y gastric bypass\$ or gastric bypass\$ or laparoscopic gastric bypass\$).mp.                                                                        |
| 7 | (biliopancreatic diversion\$ or BPD or BPD with DS or biliopancreatic diversion with duodenal switch or biliopancreatic diversion without duodenal switch or Duodenal switch).mp. |

|    |                                                                                                                                                                                                                 |
|----|-----------------------------------------------------------------------------------------------------------------------------------------------------------------------------------------------------------------|
| 8  | (jejunoileal bypass\$ or jejuno ileal bypass\$ or ileojejunal bypass\$ or ileo jejunal bypass\$).mp.                                                                                                            |
| 9  | (jejunoileal bypass\$ or jejuno ileal bypass\$ or ileojejunal bypass\$ or ileo jejunal bypass\$).mp.                                                                                                            |
| 10 | (mini bypass\$ or MOAGB or mono anostomo\$ gastric bypass\$ or OAGB or one anastomo\$ gastric bypass\$ or loop bypass\$).mp.                                                                                    |
| 11 | exp Hypoglycemia/                                                                                                                                                                                               |
| 12 | hypoglyc?emia.mp.                                                                                                                                                                                               |
| 13 | (postprandial hypoglyc?emia or post prandial hypoglyc?emia or hyperinsulin?emic hypoglyc?emia or postbariatric hypoglyc?emia or post bariatric hypoglyc?emia or Whipple\$ triad or dumping or late dumping).mp. |
| 14 | 1 or 2 or 3 or 4 or 5 or 6 or 7 or 8 or 9 or 10                                                                                                                                                                 |
| 15 | 11 or 12 or 13                                                                                                                                                                                                  |
| 16 | 14 and 15                                                                                                                                                                                                       |
